# Supplementary material for: The Grapevine E3 Ubiquitin Ligase VriATL156 Confers Resistance against the Downy Mildew Pathogen Plasmopara viticola
Source: MDPI journal article supplement (doi:10.3390/ijms22020940), 2021-01-19
Supplement: s1 [file s1]

Supplementary Table 1. List of primers used for qPCR analysis.

| Primer Name | Primer sequences        | Tm (°C) | Amplicon size |
|-------------|-------------------------|---------|---------------|
| ATL156_for  | TGAGTTTGAGGAGAACGAGAAGG | 60.6    | 100 bp        |
| ATL156_rev  | GCAAGTGGAGTGAGAGTGAAACC | 62.4    |               |
| UBI_for     | GCCCTGCACTTACCATCTTTAAG | 60.6    | 100 bp        |
| UBI_rev     | GAGGGTCGTCAGGATTGGA     | 59.4    |               |
