# Supplementary material for: The Grapevine E3 Ubiquitin Ligase VriATL156 Confers Resistance against the Downy Mildew Pathogen Plasmopara viticola
Source: MDPI journal article supplement (doi:10.3390/ijms22020940), 2021-01-19
Supplement: s1 [file s1]

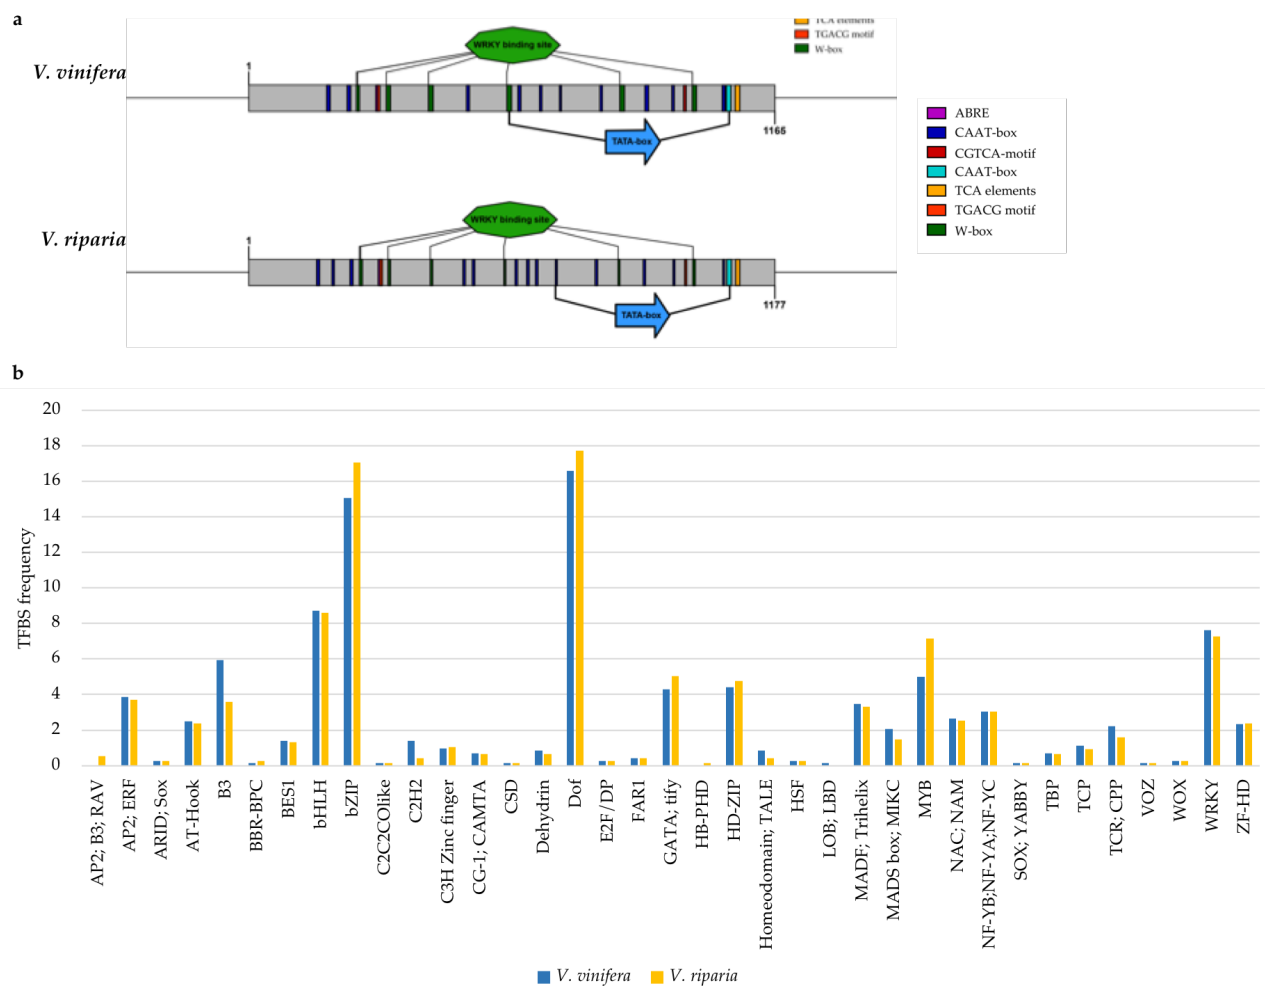

**Figure S3**

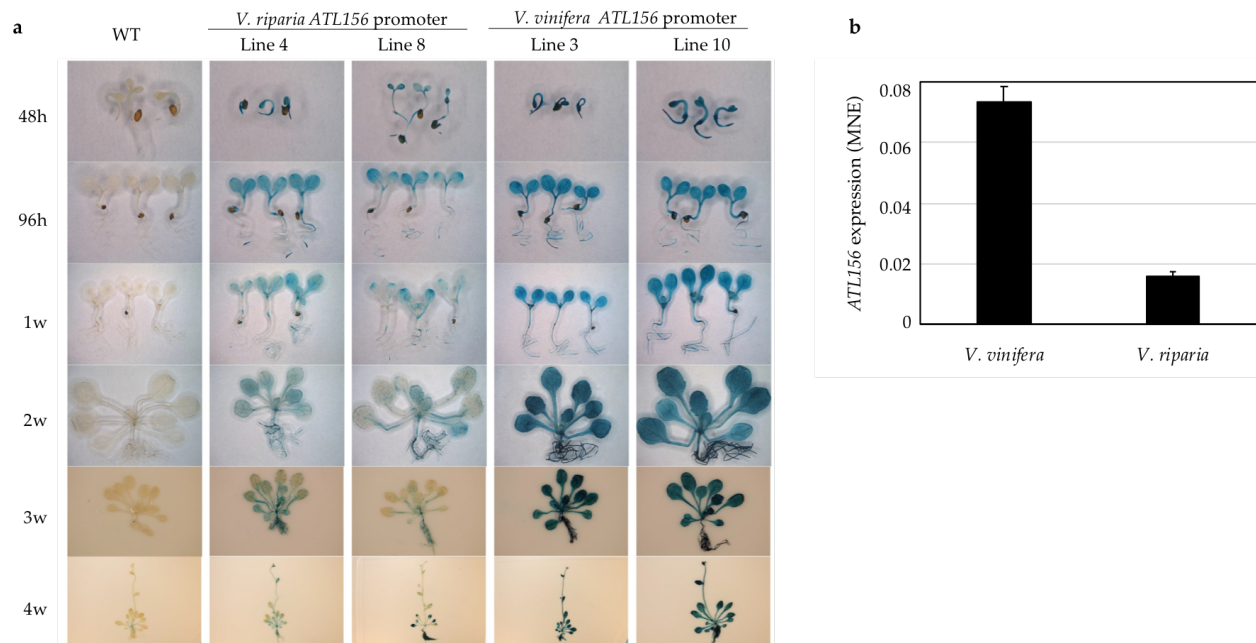

**Figure S4**

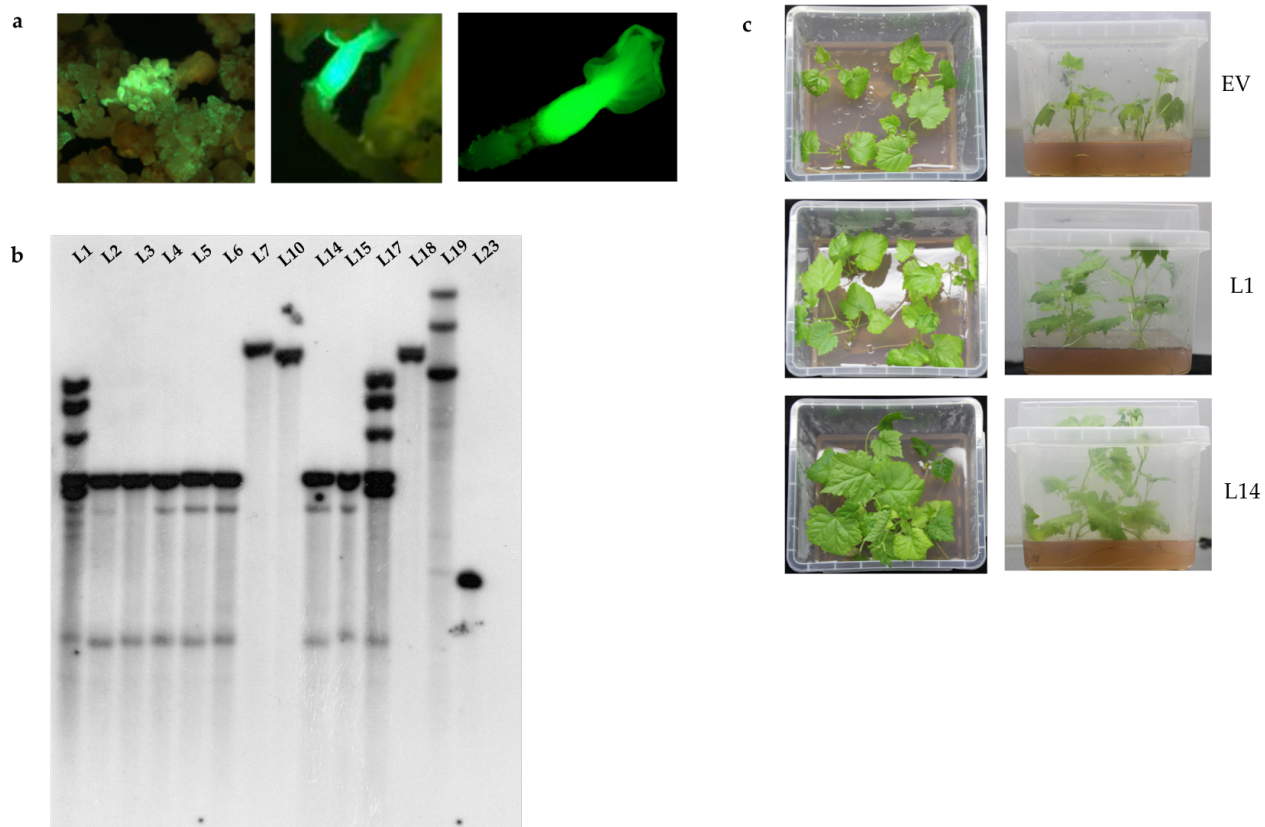

Figure S5

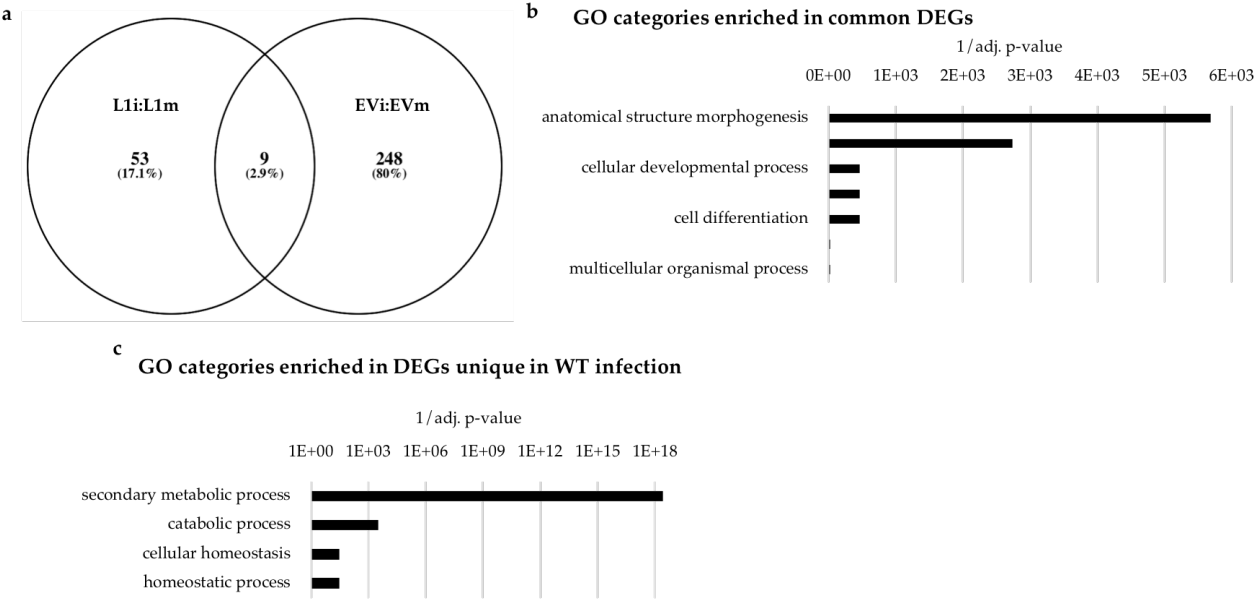

**Figure S6**

original file western blot (Figure3d)

EV L1 L14 L1 EV L1 L14 L1

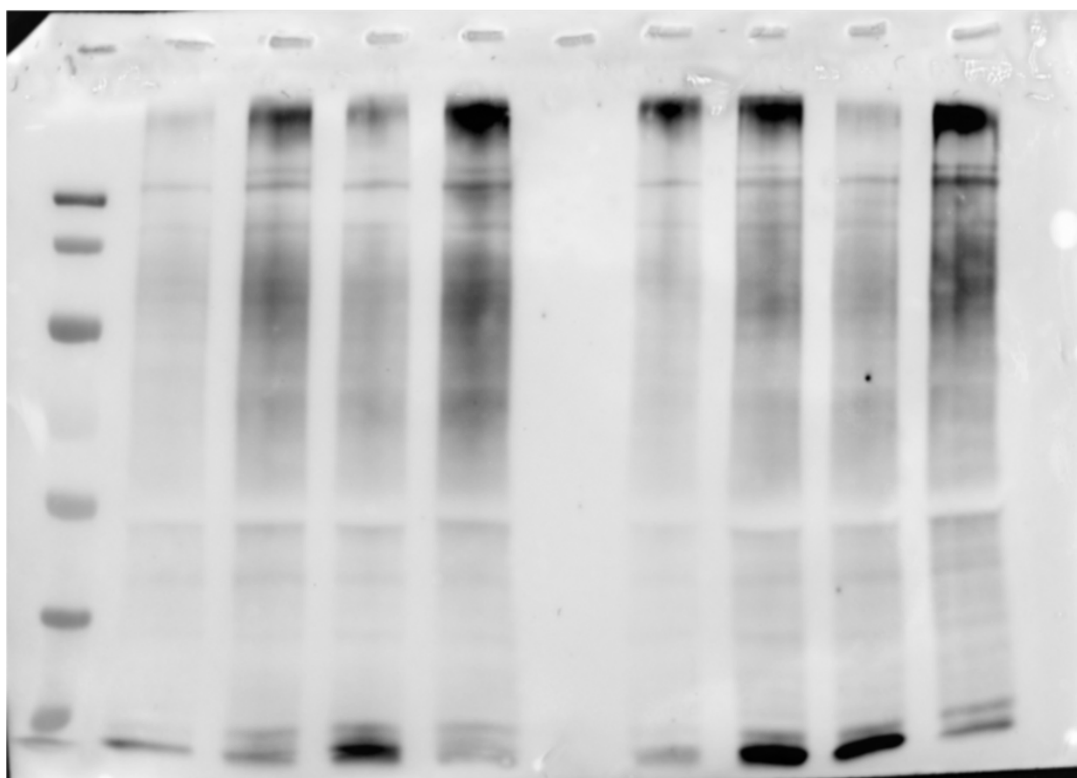

biological  
replicate 1

biological  
replicate 2

Original File (uncropped) western blot anti-Ub (Figure 3d)

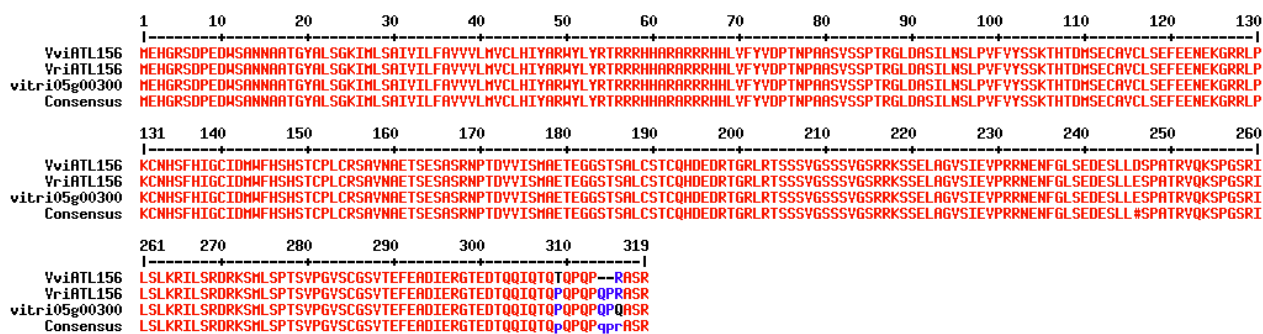

Figure S7
